# Supplementary material for: A highly active and stable hydrogen evolution catalyst based on pyrite-structured cobalt phosphosulfide
Source: PubMed Central journal article supplement (PMC4762894; doi:10.1038/ncomms10771), 2016-02-19
Supplement: ncomms10771-s1.pdf [file ncomms10771-s1.pdf]

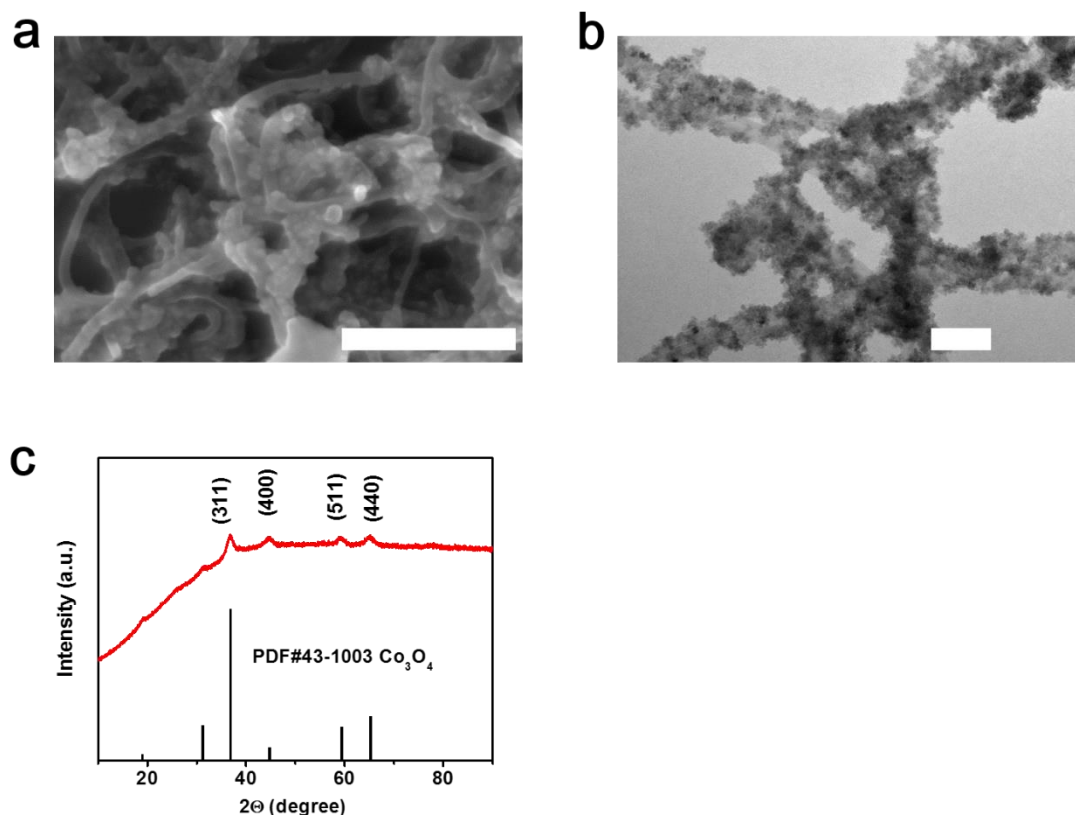

**Supplementary Figure 1 | Morphology and crystal structure of  $\text{Co}_3\text{O}_4/\text{CNT}$ . (a)** SEM image of  $\text{Co}_3\text{O}_4/\text{CNT}$ ; Scale bar, 300 nm. **(b)** TEM image of  $\text{Co}_3\text{O}_4/\text{CNT}$ ; Scale bar, 40 nm. **(c)** XRD patterns of  $\text{Co}_3\text{O}_4/\text{CNT}$ .

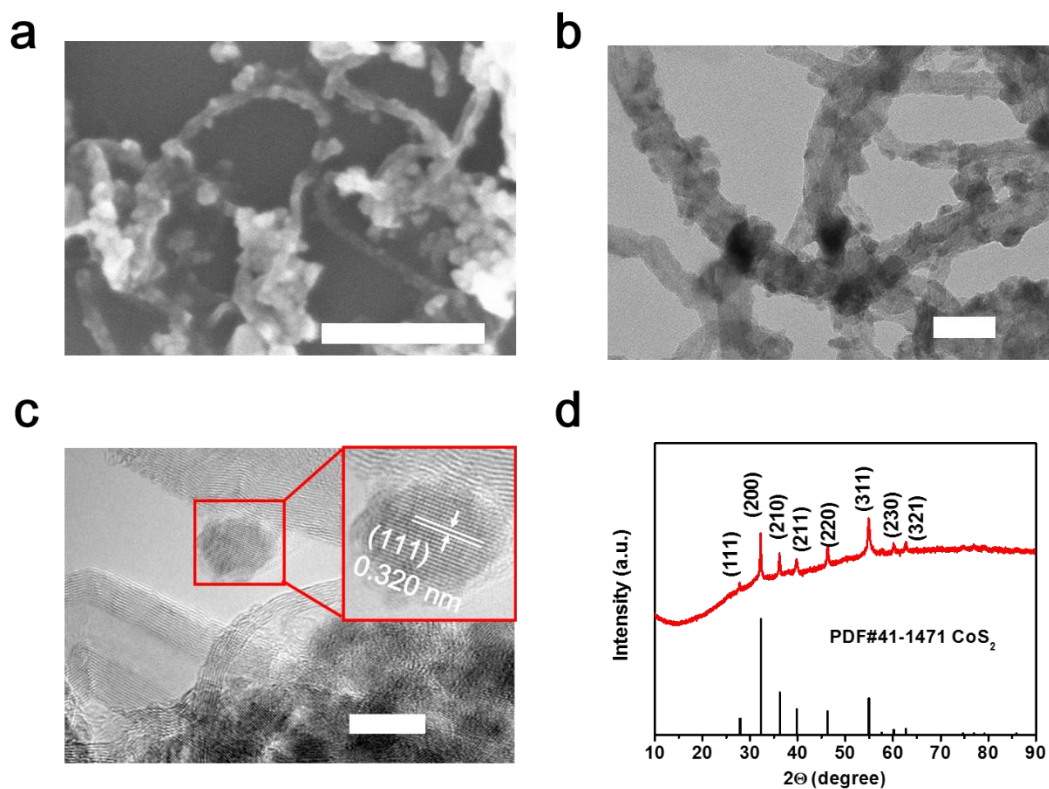

**Supplementary Figure 2 | Morphology and crystal structure of CoS<sub>2</sub>/CNT. (a)** SEM image CoS<sub>2</sub>/CNT; Scale bar, 300nm. **(b)** TEM image CoS<sub>2</sub>/CNT; Scale bar, 40 nm. **(c)** High-resolution TEM image CoS<sub>2</sub>/CNT; Scale bar, 20 nm. **(d)** XRD patterns of CoS<sub>2</sub>/CNT.

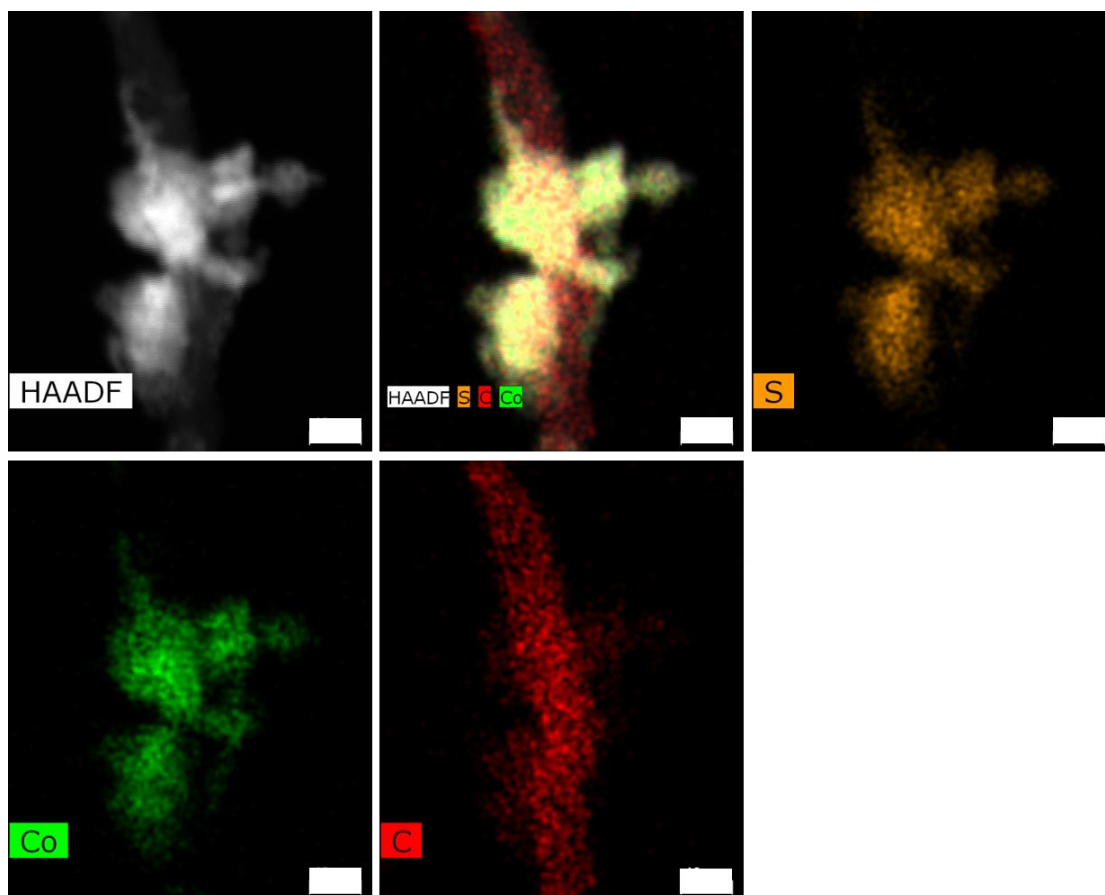

**Supplementary Figure 3 | STEM-EDX elemental mapping of the CoS<sub>2</sub>/CNT hybrid.** STEM-HAADF image and corresponding EDX mapping of S (orange), Co (green), and C (red) element in the CoS<sub>2</sub>/CNT hybrid. Scale bars, 10 nm.

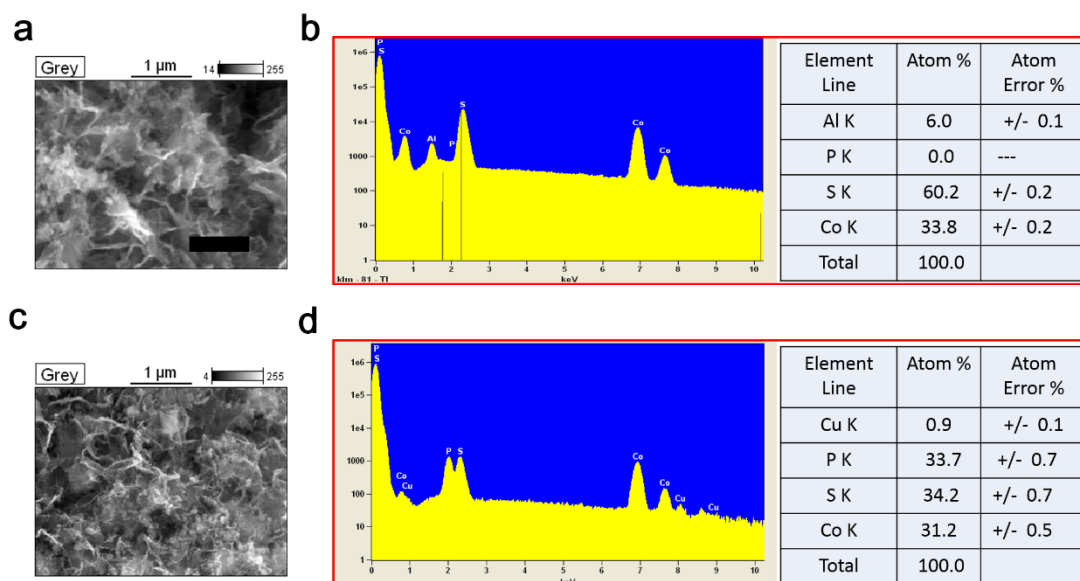

**Supplementary Figure 4 | SEM-EDS characterization of the CoS<sub>2</sub>/CNT and CoS|P/CNT hybrids.** (a, b) SEM image and corresponding EDS spectrum of CoS<sub>2</sub>/CNT. (c, d) SEM image and corresponding EDS spectrum of CoS|P/CNT.

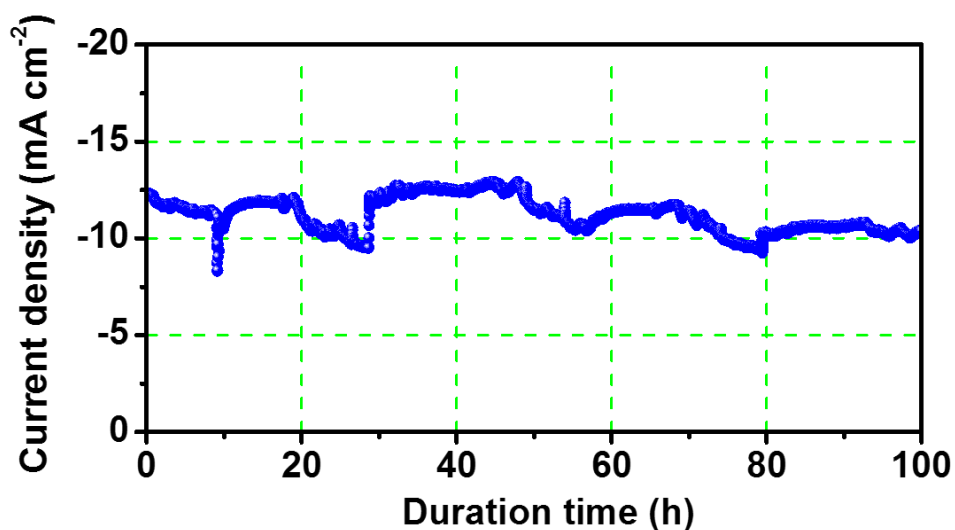

**Supplementary Figure 5 | Long time catalytic stability of the CoS|P/CNT hybrid.** Constant overpotential was employed to drive continuous hydrogen evolution reaction. After 100 hours of hydrogen production, the catalyst still maintained 84% of its initial catalytic current density (from 12.3 mA cm<sup>-2</sup> to 10.4 mA cm<sup>-2</sup>). The fluctuation of current density in the catalytic process may be caused by bubble formation and collapse.

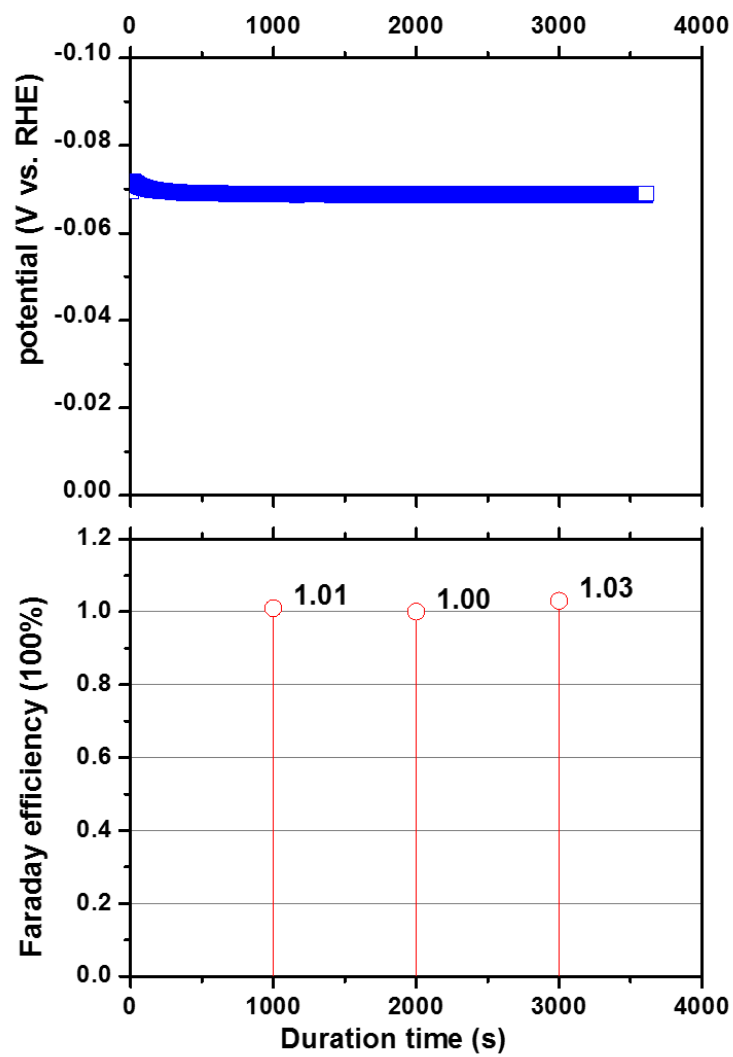

**Supplementary Figure 6 | Faradaic efficiency for HER catalyzed by CoS|P/CNT.** The actual amount of H<sub>2</sub> detected by GC-MS was compared with the current density (20 mA cm<sup>-2</sup>) to derive the Faradaic efficiency.

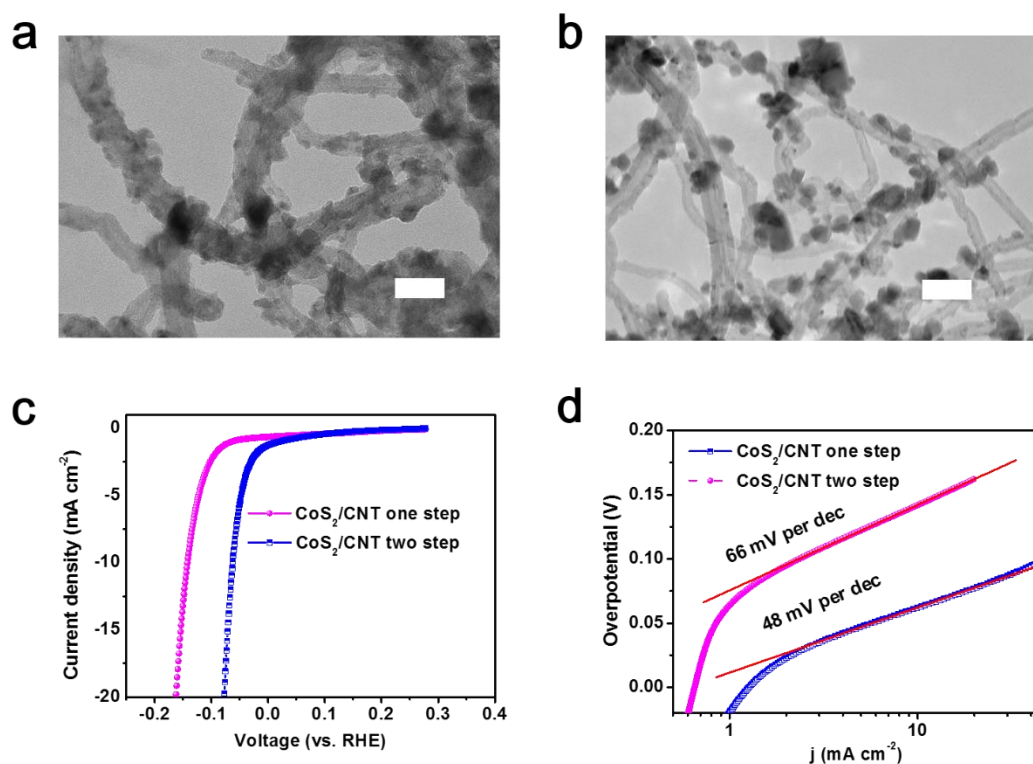

**Supplementary Figure 7 | Comparison of CoS<sub>2</sub>/CNT hybrids prepared using one-step and two-step methods. (a)** TEM image of the CoS<sub>2</sub>/CNT hybrid prepared with the two-step method. Scale bar, 40 nm. **(b)** TEM image of another CoS<sub>2</sub>/CNT hybrid prepared using a one-step hydrothermal reaction; Scale bar, 40 nm. **(c)** The polarization curves of the CoS<sub>2</sub>/CNT hybrids prepared with one-step and two-step methods. Catalyst mass loading was 0.8 mg cm<sup>-2</sup>. **(d)** Corresponding Tafel slopes of the CoS<sub>2</sub>/CNT hybrids derived from **(c)**.

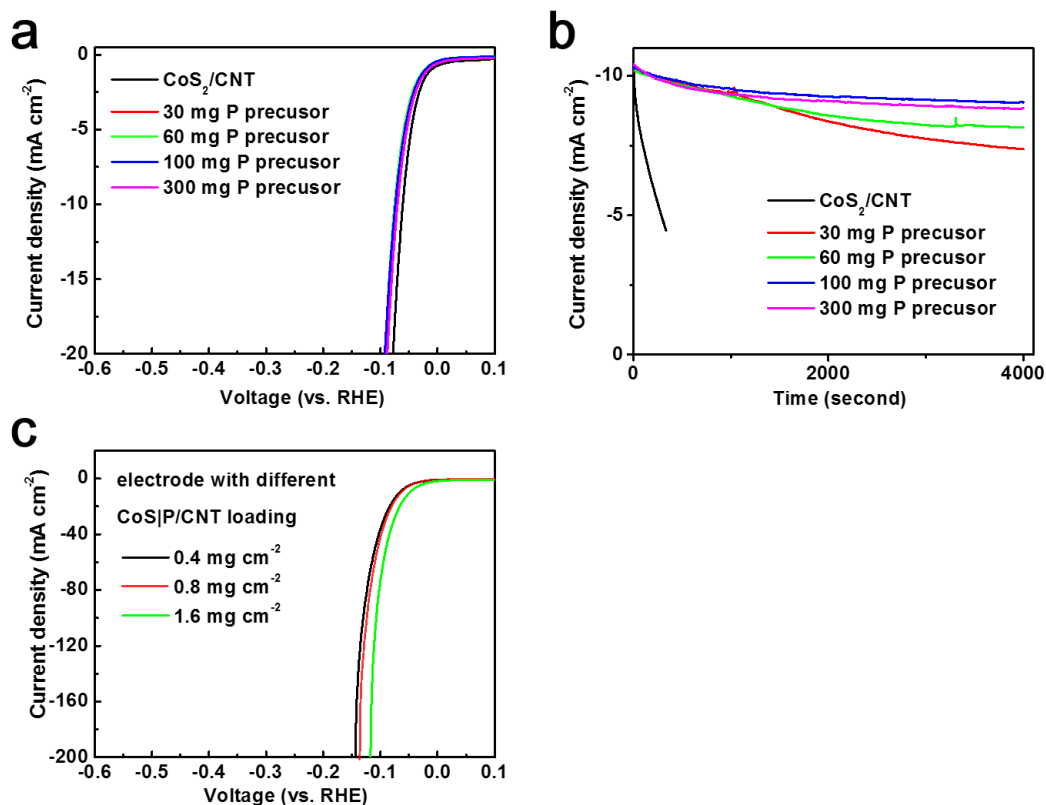

**Supplementary Figure 8 | Catalytic activity and durability of  $\text{CoS}_2/\text{CNT}$  and  $\text{CoS}_{2-x}\text{P}_x/\text{CNT}$  hybrids with different P/S ratios and different catalyst loadings. (a)** Polarization curves of  $\text{CoS}_{2-x}\text{P}_x/\text{CNT}$  hybrids prepared with different P dosages where 30, 60, 100 and 300 mg of  $\text{NaH}_2\text{PO}_2 \cdot \text{H}_2\text{O}$  salt were used for 5 mg of  $\text{CoS}_2/\text{CNT}$ ; The  $\text{CoS}_2/\text{CNT}$  was used as a comparison. The catalyst mass loading was  $0.8 \text{ mg cm}^{-2}$ . **(b)** The durability ( $j \sim t$  curves) of  $\text{CoS}_{2-x}\text{P}_x/\text{CNT}$  hybrids with different P/S ratios. The catalyst mass loading was  $0.8 \text{ mg cm}^{-2}$ . The curves were recorded without iR compensation. **(c)** Polarization curves of  $\text{CoS|P/CNT}$  ( $\text{CoS}_{2-x}\text{P}_x/\text{CNT}$  with 100 mg P precursor) electrodes with different catalyst mass loadings.



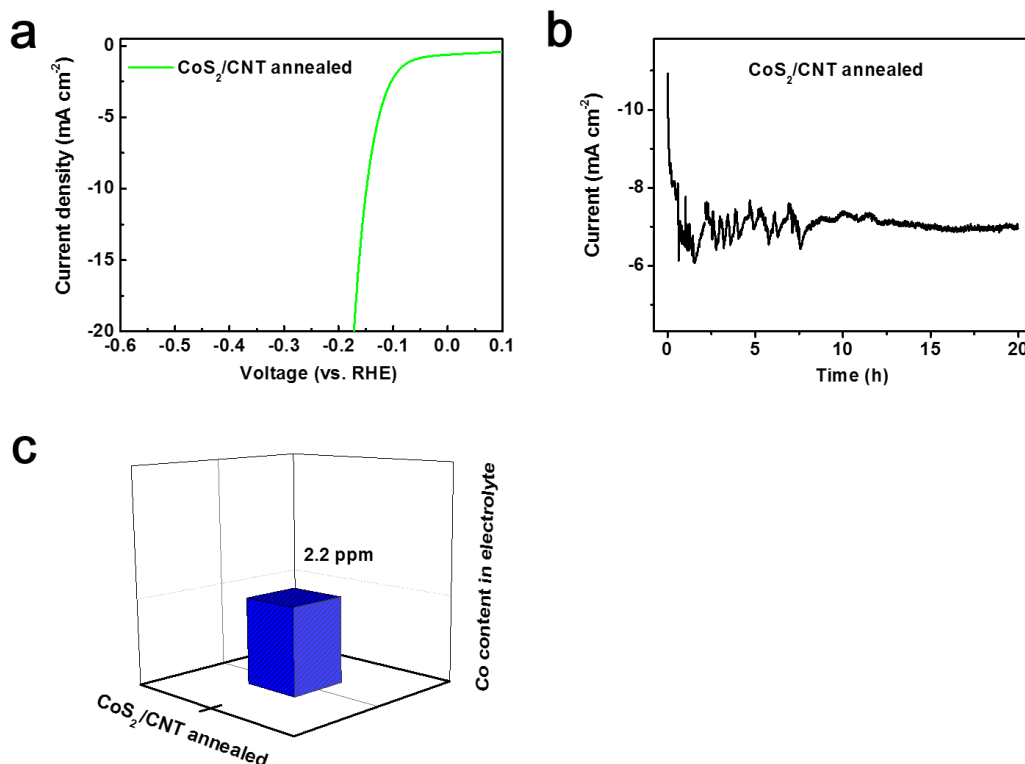

**Supplementary Figure 9 | Catalytic activity and durability of the CoS<sub>2</sub>/CNT hybrid annealed in Ar at 400 °C.** (a) Polarization curve of CoS<sub>2</sub>/CNT after annealing in Ar at 400 °C for 1 h, showing lower HER activity compared to the as-made CoS<sub>2</sub>/CNT hybrid; the catalyst mass loading was 0.8 mg cm<sup>-2</sup>. (b) Durability of the annealed CoS<sub>2</sub>/CNT hybrid for HER in 0.5 M H<sub>2</sub>SO<sub>4</sub> solution, showing that the stability of the annealed CoS<sub>2</sub>/CNT is inferior to CoS|P/CNT; 0.4 mg of catalyst was loaded on a carbon fiber paper with 0.5 cm<sup>2</sup> of active area. The test was performed without iR compensation. (c) The concentration of Co dissolved in electrolyte for the annealed CoS<sub>2</sub>/CNT hybrid after 20 h of HER electrolysis corresponding to the  $j \sim t$  curve in (b).

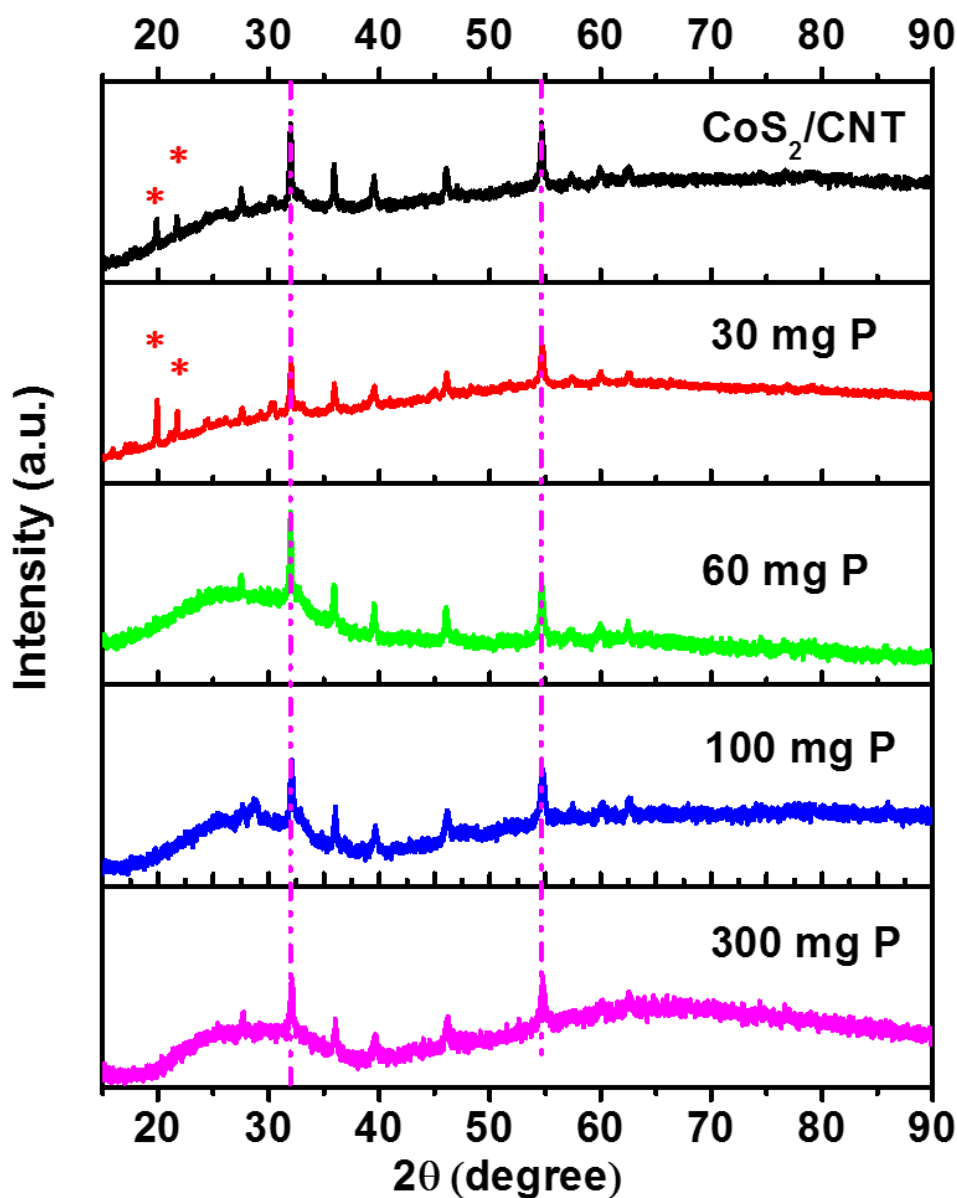

**Supplementary Figure 10 | XRD patterns of the CoS<sub>2</sub>/CNT and CoS<sub>2-x</sub>P<sub>x</sub>/CNT hybrids with different P/S ratios.** In the study, the P/S ratio of the CoS<sub>2-x</sub>P<sub>x</sub>/CNT can be readily tuned between 0 and 1 by varying the dosages of NaH<sub>2</sub>PO<sub>2</sub>·H<sub>2</sub>O used. The diffraction patterns remain almost unchanged from the original CoS<sub>2</sub>/CNT within the P/S range studied. The diffraction peaks marked with asterisk symbols in the XRD patterns of CoS<sub>2</sub>/CNT and 30 mg P can be assigned to CoSO<sub>4</sub>·4H<sub>2</sub>O (PDF#16-0488) which was formed from partially oxidation of pyrite CoS<sub>2</sub> in ambient condition. However, for the samples with higher P doping extents, no sulfate phase was detected. This confirms the role of P doping on the chemical stability of CoS|P.

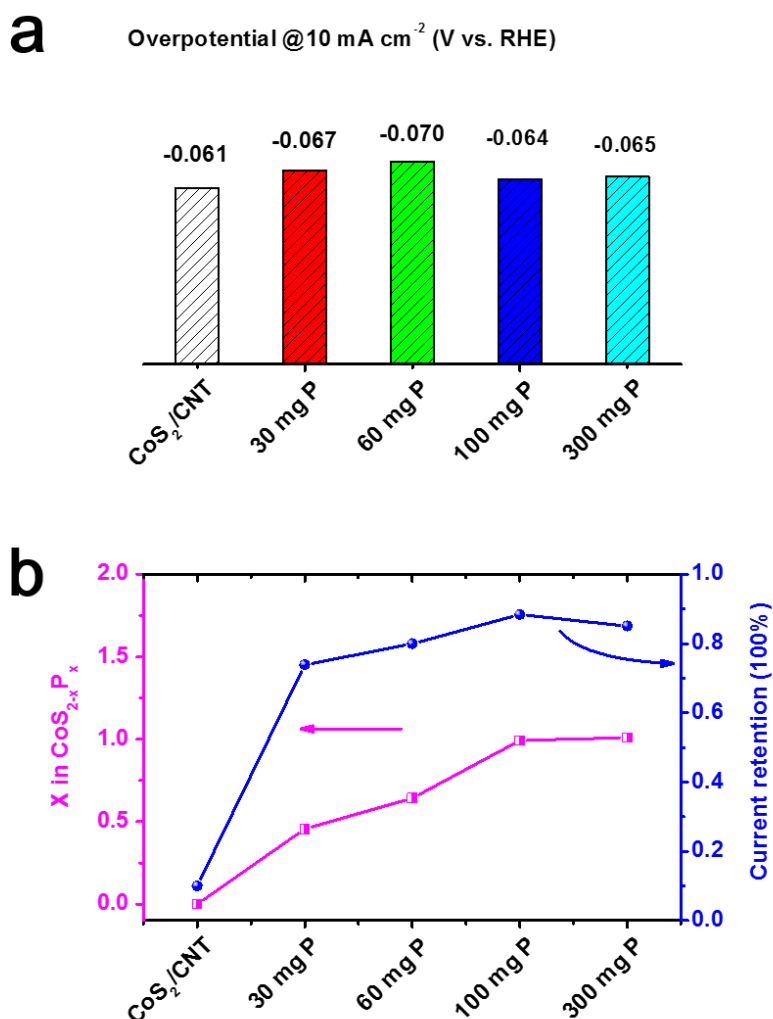

**Supplementary Figure 11 | Catalytic activity and durability (derived from Supplementary Figure 8) of CoS<sub>2</sub>/CNT and CoS<sub>2-x</sub>P<sub>x</sub>/CNT hybrids with different P/S ratios. (a)** Potentials needed for the CoS<sub>2</sub>/CNT and CoS<sub>2-x</sub>P<sub>x</sub>/CNT hybrids with different P doping levels to drive an HER current density of 10 mA cm<sup>-2</sup>, showing that the catalytic activity is not affected by P substitution. **(b)** The correlation between catalytic durability and P content of the CoS<sub>2-x</sub>P<sub>x</sub>/CNT hybrids. After driving HER at ~10 mA cm<sup>-2</sup> for 3600 seconds, the retention of catalytic current was compared among the catalysts with different P/S ratios. The P content in the CoS<sub>2-x</sub>P<sub>x</sub>/CNT hybrids increased with increasing P precursor dosage used in the synthesis until 50% of S was substituted with P (x=1.0 for CoS<sub>2-x</sub>P<sub>x</sub>). Further increase of the P dosage could not increase the P/S ratio of the CoS<sub>2-x</sub>P<sub>x</sub>/CNT. The catalytic stability of the CoS<sub>2-x</sub>P<sub>x</sub>/CNT was drastically enhanced by P doping.

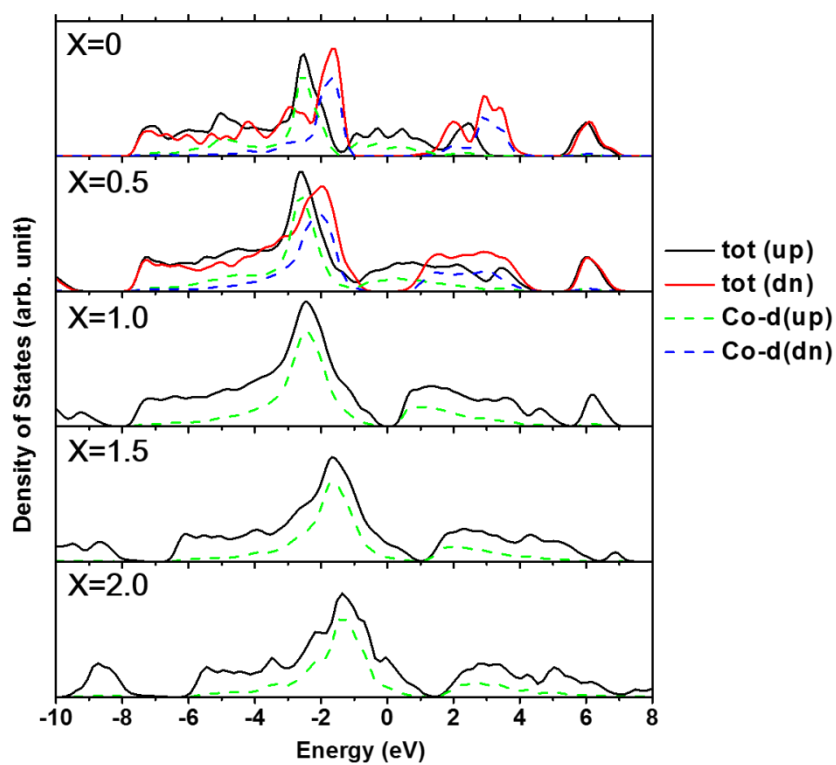

**Supplementary Figure 12 | Spin-resolved projected density of states (PDOS) for  $\text{CoS}_{2-x}\text{P}_x$  obtained from PBE+ $U$  calculations.** Please note for  $x = 0$  and  $0.5$ , the ground states are magnetic, while for  $x = 1.0, 1.5$  and  $2$  the ground states are non-magnetic. In the figure, tot (up), tot (dn), Co-d (up) and Co-d (dn) stand for total spin-up density of states, total spin-down density of states, Co 3d spin-up density of states and Co 3d spin-down density of states, respectively.

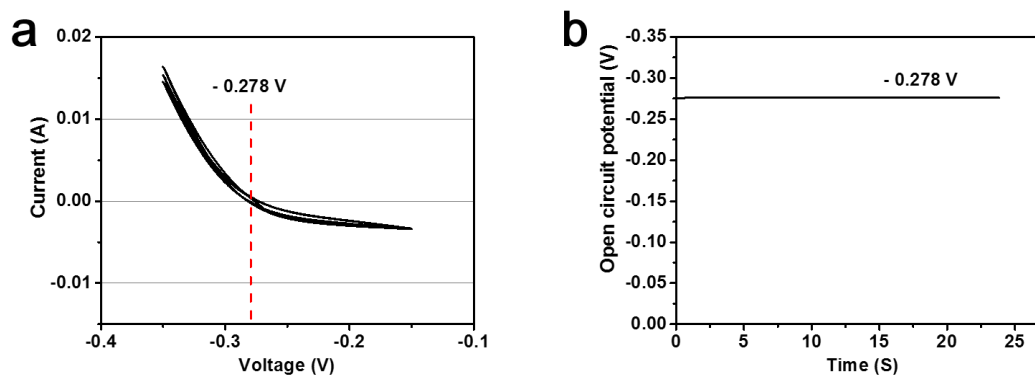

**Supplementary Figure 13 | Calibration of the reference electrode. (a)** Cyclic voltammetry (CV) curve of hydrogen oxidation and evolution in 0.5 M  $\text{H}_2\text{SO}_4$ ; **(b)** Open circuit potential of the electrochemical cell. The saturated calomel electrode (SCE) was calibrated with respect to the reversible hydrogen electrode (RHE). The 0.5 M  $\text{H}_2\text{SO}_4$  electrolyte was firstly saturated with ultrahigh purity hydrogen gas. A Pt net was used as the working electrode, a Pt-Rh net as the counter electrode and the SCE electrode as the reference electrode. CV was performed at a scan rate of  $5 \text{ mV s}^{-1}$ , and the average of the two potentials at which the current crossed zero was taken as the thermodynamic potential based on SCE for the  $\text{H}^+/\text{H}_2$  reactions. The open circuit potential was also measured for this three electrode configuration to further confirm the electrode potential of SCE in 0.5 M  $\text{H}_2\text{SO}_4$  electrolyte.

**Supplementary Table 1 | HER activity comparison of the CoS|P/CNT hybrid with the most active non-noble metal based catalyst materials reported in the literature**

| Catalyst                                                   | $\eta@10\text{mA}$<br>$\text{cm}^{-2}$<br>(mV) | Tafel<br>slope<br>(mV<br>$\text{dec}^{-1}$ ) | $J_0$<br>( $\text{mA cm}^{-2}$ ) | Loading<br>( $\text{mg cm}^{-2}$ ) | Reference |
|------------------------------------------------------------|------------------------------------------------|----------------------------------------------|----------------------------------|------------------------------------|-----------|
| CoS P/CNT                                                  | 48                                             | 55                                           | 1.14                             | 1.6                                | This work |
|                                                            | 63                                             | 48                                           | 0.83                             | 0.8                                |           |
|                                                            | 67                                             | 49                                           | 0.64                             | 0.4                                |           |
| CoS <sub>2</sub> film                                      | 232                                            | 44.6                                         | 5.40E-05                         | N/A                                | 1         |
| CoSe <sub>2</sub> film                                     | 230                                            | 42.5                                         | 5.00E-05                         | N/A                                |           |
| Co <sub>0.32</sub> Ni <sub>0.68</sub> S <sub>2</sub> film  | 276                                            | 66.3                                         | 2.50E-04                         | N/A                                |           |
| Fe <sub>0.43</sub> Co <sub>0.57</sub> S <sub>2</sub> film  | 192                                            | 55.9                                         | 1.60E-03                         | N/A                                |           |
| Co <sub>0.56</sub> Ni <sub>0.44</sub> Se <sub>2</sub> film | 252                                            | 49.7                                         | 7.10E-05                         | N/A                                |           |
| CoSe <sub>2</sub> NPs                                      | N/A                                            | 40                                           | 3.70E-02                         | 0.037                              |           |
| CoS <sub>2</sub> /rGO/CNTs                                 | 143                                            | 51                                           | 6.26E-02                         | 1.15                               | 2         |
| CoS <sub>2</sub>                                           | 327                                            | 148                                          | 1.01E-02                         | 0.280                              |           |
| CoS <sub>2</sub> /rGO                                      | 278                                            | 82                                           | 7.02E-03                         | 0.280                              |           |
| CoS <sub>2</sub> film                                      | N/A                                            | 48.8                                         | 1.91E-05                         | N/A                                | 3         |
| Fe <sub>0.07</sub> Ni <sub>0.93</sub> S <sub>2</sub>       | N/A                                            | 58.7                                         | 4.69E-05                         | N/A                                |           |
| Fe <sub>0.48</sub> Co <sub>0.52</sub> S <sub>2</sub>       | 196                                            | 47.5                                         | 9.59E-04                         | N/A                                |           |
| Co <sub>0.59</sub> Ni <sub>0.41</sub> S <sub>2</sub>       | N/A                                            | 50.4                                         | 4.76E-05                         | N/A                                |           |
| Fe <sub>0.9</sub> Co <sub>0.1</sub> S <sub>2</sub> /CNT    | 160                                            | 46                                           | N/A                              | 0.4                                | 4         |
| CoS <sub>2</sub> nanopyramids on<br>Ti foil                | 193                                            | 72                                           | N/A                              | N/A                                | 5         |
| CoS <sub>2</sub> nanowires                                 | 145                                            | 51.6                                         | 1.51E-02                         | 1.7±0.3                            | 6         |
| Co <sub>2</sub> P hollow NPs                               | 95                                             | 45                                           | N/A                              | 1.0                                | 7         |
| CoP hollow NPs                                             | 75                                             | 50                                           | N/A                              |                                    |           |
| CoP nanowire arrays<br>on carbon cloth                     | 67                                             | 51                                           | 0.288                            | 0.92                               | 8         |
| CoP@CNT                                                    | 117                                            | 54                                           | 0.13                             | N/A                                | 9         |
| FeP NPs                                                    | 50                                             | 37                                           | 0.43                             | 1.0                                | 10        |
| CoS <sub>2</sub> /P nanosheets                             | 67                                             | 50                                           | 0.47                             | 2.5                                | 11        |
| CoPS NPIs                                                  | 48                                             | 56                                           | 0.984                            | N/A                                | 12        |
| CoPS film                                                  | 128                                            | 57                                           | 0.056                            | N/A                                |           |
| CoPS NWs                                                   | 61                                             | 75                                           | 0.554                            | N/A                                |           |

|                                     |     |       |           |      |    |
|-------------------------------------|-----|-------|-----------|------|----|
| 1T MoS <sub>2</sub>                 | 210 | ~40   | N/A       | N/A  | 13 |
| 2H MoS <sub>2</sub>                 | 368 | 75-85 |           |      |    |
| Mo phosphosulfide                   | 86  | 50    | 0.2       | 1.0  | 14 |
| Li intercalated MoS <sub>2</sub>    | 113 | 43~47 | 0.13~0.25 | 0.12 | 15 |
| MoS <sub>2</sub> /CoSe <sub>2</sub> | 68  | 36    | 0.073     | 0.28 | 16 |
| MoP NPs                             | 125 | 54    | 0.086     | 0.36 | 17 |

---

## Supplementary Methods

### Materials

NaH<sub>2</sub>PO<sub>2</sub>·H<sub>2</sub>O was purchased from Alfa Aesar. H<sub>2</sub>SO<sub>4</sub>, KMnO<sub>4</sub>, absolute alcohol, NaNO<sub>3</sub>, NaOH, and H<sub>2</sub>O<sub>2</sub> (30% solution) were obtained from VWR Corporation. CNTs (FloTube™ 9000) were received from CNano Technology (Beijing) Ltd. Thioacetamide and cobalt acetate was purchased from Acros Organics. Nafion (5 wt%) was bought from Sigma-Aldrich. All the reagents were used as received. The water used throughout all experiments was purified through a Millipore system.

### Preparation of mildly oxidized CNTs

Mildly oxidized CNTs were prepared through a modified Hummers method<sup>18</sup>. 1 g of multi-wall CNTs were first purified by calcination in air at 500 °C and refluxing with 40 mL of diluted hydrochloric acid (10%) to remove amorphous carbon and residual catalyst particles. The purified CNTs were washed with DI water and dried in oven at 80 °C overnight. Then, the purified CNTs were moved into a 250 mL flask and 23 mL of concentrated sulfuric acid was added. The mixture was stirred at room temperature for 12 h. After that, the flask was heated to 40 °C in an oil bath, followed by slow addition of 100 mg of NaNO<sub>3</sub>. After 5 min, 4 g of KMnO<sub>4</sub> was slowly added into the suspension, keeping the reaction temperature no higher than 45 °C. The suspension was stirred for 30 min and followed by addition of 3 mL of DI water. 5 min later, another 3 mL of DI water was added. After another 5 min, 40 mL of DI water was added. 15 min later, the flask was removed from the oil bath and 140 mL of water and 30 mL of 30% H<sub>2</sub>O<sub>2</sub> was added to stop the reaction. The suspension was stirred at room temperature for 15 min. It was then centrifuged and washed with 5% hydrochloride acid solution for 3 times, followed by repeated wash with DI water until pH value reached higher than 5. The final precipitate was then collected and freeze-dried.

### Materials characterizations

XRD measurements were performed using a Rigaku Smartlab X-ray diffractometer with Cu K $\alpha$  radiation. SEM images were obtained on a Hitachi SU70 field emission SEM. Low-magnification TEM measurements were performed on a JEM 1400 (JEOL USA) with an accelerating voltage at 80 kV. High-resolution TEM imaging and STEM-EDS mapping were done with an FEI TECNAI Osiris at an accelerating voltage of 200 kV. XPS studies were performed using a Kratos Axis Ultra X-ray photoelectron spectrometer with Al K $\alpha$  radiation ( $h\nu = 1486.71$  eV). Raman spectra were obtained using a confocal micro-Raman spectroscopy (LabRam HR Evolution, Horiba) with a 532 nm excitation laser.

### Colorimetric comparison

2.5 mg of catalyst material was soaked into 10 mL of 0.5 M H<sub>2</sub>SO<sub>4</sub> solution for 2 h. After that, the mixture was centrifuged and the supernatant was collected. 20  $\mu$ L of supernatant, 5 mL of sodium acetate solution (250 g L<sup>-1</sup>), and 3 mL of Nitrite R salt solution (10 g L<sup>-1</sup>) were added



---

into a 25 mL vial. The dissolved  $\text{Co}^{2+}$  can form a red-colored complex with the nitrite R salt in acetate buffer solution.

---

### Supplementary References

1. Kong DS, Cha JJ, Wang HT, Lee HR, Cui Y. First-row transition metal dichalcogenide catalysts for hydrogen evolution reaction. *Energy Environ Sci* **6**, 3553-3558 (2013).
2. Peng S, *et al.* Cobalt sulfide nanosheet/graphene/carbon nanotube nanocomposites as flexible electrodes for hydrogen evolution. *Angew. Chem. Int. Ed. Engl.* **53**, 12594-12599 (2014).
3. Faber MS, Lukowski MA, Ding Q, Kaiser NS, Jin S. Earth-Abundant Metal Pyrites (FeS, CoS, NiS, and Their Alloys) for Highly Efficient Hydrogen Evolution and Polysulfide Reduction Electrocatalysis. *J Phys Chem C Nanomater Interfaces* **118**, 21347-21356 (2014).
4. Wang DY, *et al.* Highly active and stable hybrid catalyst of cobalt-doped FeS<sub>2</sub> nanosheets-carbon nanotubes for hydrogen evolution reaction. *J. Am. Chem. Soc.* **137**, 1587-1592 (2015).
5. Zhang H, *et al.* Highly Crystallized Cubic Catterite CoS<sub>2</sub> for Electrochemically Hydrogen Evolution over Wide pH Range from 0 to 14. *Electrochim. Acta* **148**, 170-174 (2014).
6. Faber MS, Dziedzic R, Lukowski MA, Kaiser NS, Ding Q, Jin S. High-performance electrocatalysis using metallic cobalt pyrite CoS<sub>2</sub> micro- and nanostructures. *J. Am. Chem. Soc.* **136**, 10053-10061 (2014).
7. Callejas JF, Read CG, Popczun EJ, McEnaney JM, Schaak RE. Nanostructured Co<sub>2</sub>P Electrocatalyst for the Hydrogen Evolution Reaction and Direct Comparison with Morphologically Equivalent CoP. *Chem. Mater.* **27**, 3769-3774 (2015).
8. Tian J, Liu Q, Asiri AM, Sun X. Self-supported nanoporous cobalt phosphide nanowire arrays: an efficient 3D hydrogen-evolving cathode over the wide range of pH 0-14. *J. Am. Chem. Soc.* **136**, 7587-7590 (2014).
9. Liu Q, *et al.* Carbon Nanotubes Decorated with CoP Nanocrystals: A Highly Active Non-Noble-Metal Nanohybrid Electrocatalyst for Hydrogen Evolution. *Angew. Chem. Int. Ed.* **53**, 6710-6714 (2014).
10. Callejas JF, *et al.* Electrocatalytic and Photocatalytic Hydrogen Production from Acidic and Neutral-pH Aqueous Solutions Using Iron Phosphide Nanoparticles. *ACS Nano* **8**, 11101-11107 (2014).
11. Ouyang C, *et al.* Hierarchically Porous Ni<sub>3</sub>S<sub>2</sub> Nanorod Array Foam as Highly Efficient Electrocatalyst for Hydrogen Evolution Reaction and Oxygen Evolution Reaction. *Electrochim. Acta* **174**, 297-301 (2015).
12. Caban-Acevedo M, *et al.* Efficient hydrogen evolution catalysis using ternary pyrite-type cobalt phosphosulphide. *Nat. Mater.* **14**, 1245-1251 (2015).
13. Voiry D, *et al.* Conducting MoS<sub>2</sub> nanosheets as catalysts for hydrogen evolution reaction. *Nano Lett.* **13**, 6222-6227 (2013).
14. Kibsgaard J, Jaramillo TF. Molybdenum Phosphosulfide: An Active, Acid-Stable, Earth-Abundant Catalyst for the Hydrogen Evolution Reaction. *Angew. Chem. Int. Ed.* **53**, 14433-14437 (2014).
15. Wang H, *et al.* Electrochemical tuning of vertically aligned MoS<sub>2</sub> nanofilms and its application in improving hydrogen evolution reaction. *Proc. Natl. Acad. Sci. U. S. A.* **110**, 19701-19706 (2013).
16. Gao MR, *et al.* An efficient molybdenum disulfide/cobalt diselenide hybrid catalyst for electrochemical hydrogen generation. *Nat Commun* **6**, 5982 (2015).
17. Xing Z, Liu Q, Asiri AM, Sun X. Closely interconnected network of molybdenum phosphide nanoparticles: a highly efficient electrocatalyst for generating hydrogen from water. *Adv. Mater.* **26**, 5702-5707 (2014).
18. Liang Y, *et al.* Oxygen reduction electrocatalyst based on strongly coupled cobalt oxide nanocrystals and carbon nanotubes. *J Am Chem Soc* **134**, 15849-15857 (2012).
